# Supplementary material for: Zeolitic imidazolate framework-67 in chitosan-grafted hydrogel as an effective catalyst for peroxymonosulfate activation to degrade antibiotics and dyes
Source: Royal Society of Chemistry journal article supplement (doi:10.1039/d4ra06537a), 2024-01-01

## Supplementary Material

### Zeolitic imidazolate framework-67 in chitosan-grafted hydrogel as an effective catalyst for peroxymonosulfate activation to degrade antibiotics and dyes

#### Text S1.

The functional groups of chitosan-g-PAA hydrogel and the ZIF-67 composite hydrogel were studied using attenuated total reflection Fourier transform infrared (FTIR) spectroscopy (Bruker, Tensor 27, Germany). Field emission scanning electron microscopy in conjunction with energy-dispersive X-ray spectroscopy (FESEM–EDS) was used to analyze the morphology of the composite hydrogel. Thermal analysis of the samples was performed using a thermogravimetric analyzer (DTG–60H, Shimadzu, Japan) under a nitrogen atmosphere at a heating rate of 10 °C/min. The crystallinity of the samples was analyzed using an X-ray diffractometer (XRD, EMPYREAN, PANalytical, United Kingdom). The surface elemental composition and oxidation state of the composite hydrogel was analyzed using X-ray photoelectron spectroscopy (XPS, PHI5000 VersaProbe II, ULVAC-PHI, Japan). The concentration of Co<sup>2+</sup> was analyzed using an atomic absorption spectrophotometer (AAS, PerkinElmer, FIAS 100, USA). The absorbances of TC and other antibiotics were measured using a UV-Vis spectrophotometer (Agilent 8453, USA). Electron paramagnetic resonance (EPR) spectroscopy (Bruker, ELEXSYS500, Germany) was used to determine the radicals generated in the degradation process.

**Figure S1.** TGA and corresponding DTG thermograms of the chitosan-g-PAA hydrogel and the ZIF-67 composite hydrogel.

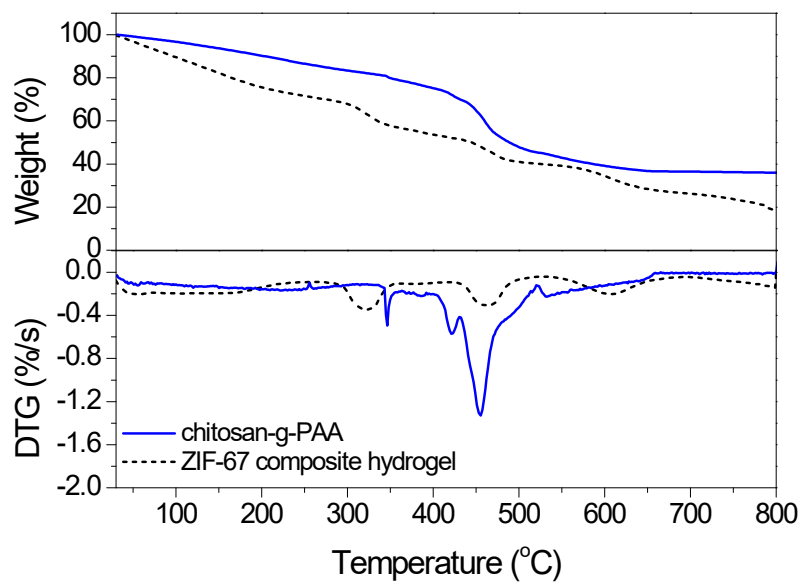

**Figure S2.** XRD patterns of the chitosan-g-PAA hydrogel and the ZIF-67 composite hydrogel.

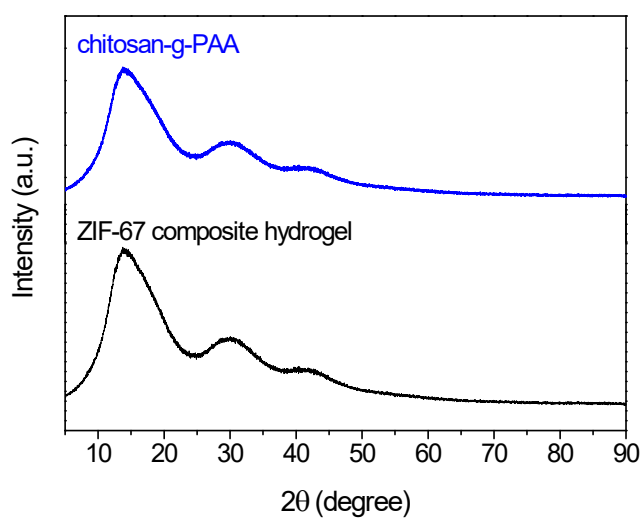

**Figure S3.** FTIR spectra of the fresh ZIF-67 composite hydrogel and the composite hydrogel after five cycles.

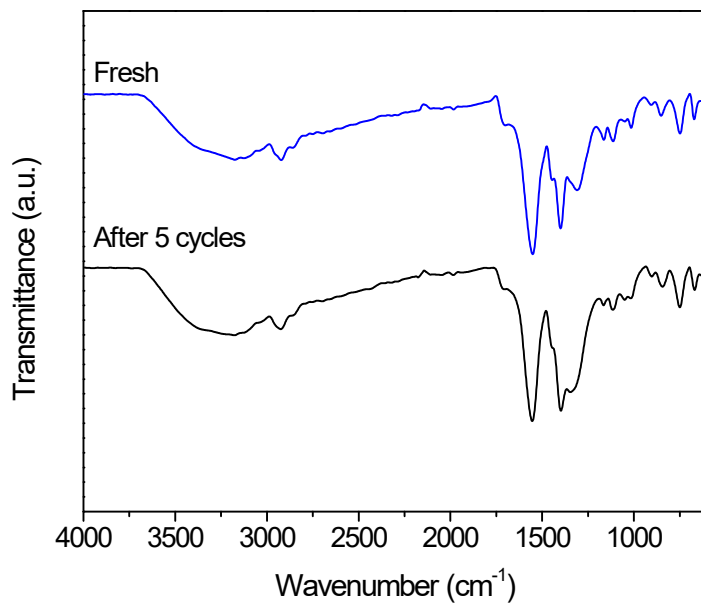

Supplement: d4ra06537a1.pdf [file d4ra06537a1.pdf]
